1 Supplemental Figure 1

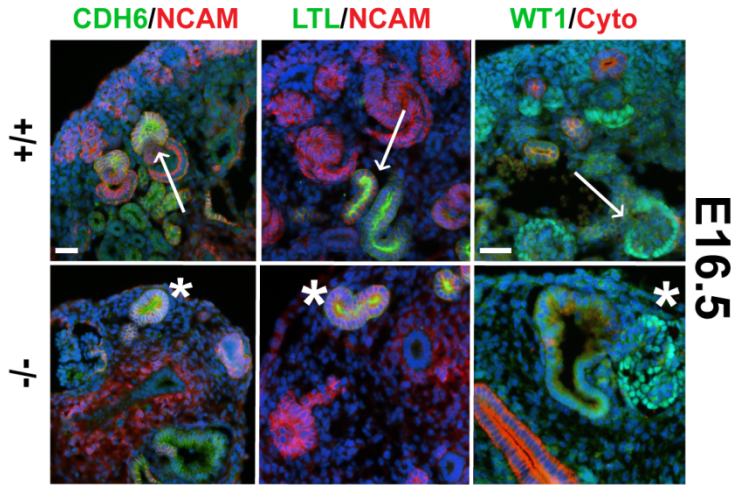

2  
3 **Supplemental Figure 1. Nephron differentiation is abnormal in the *Sall1*<sup>GFP</sup> mutant.**  
4 CDH6 and LTL staining of E16.5 kidney reveal proximal tubule development in the +/+  
5 toward the interior of the kidney, while WT1 staining shows proper glomeruli formation  
6 (arrows). In the *Sall1*<sup>GFP</sup> -/- there are CDH6, LTL, and WT1+ structures toward the  
7 periphery of the kidney in the nephrogenic zone (asterisks). The WT1+ structures are  
8 poorly organized in the mutant. Scale bar = 50 μm.

9  
10  
11  
12  
13  
14  
15  
16  
17  
18  
19  
20  
21  
22  
23  
24  
25  
26  
27  
28  
29  
30  
31  
32  
33

34 Supplemental Figure 2  
 35

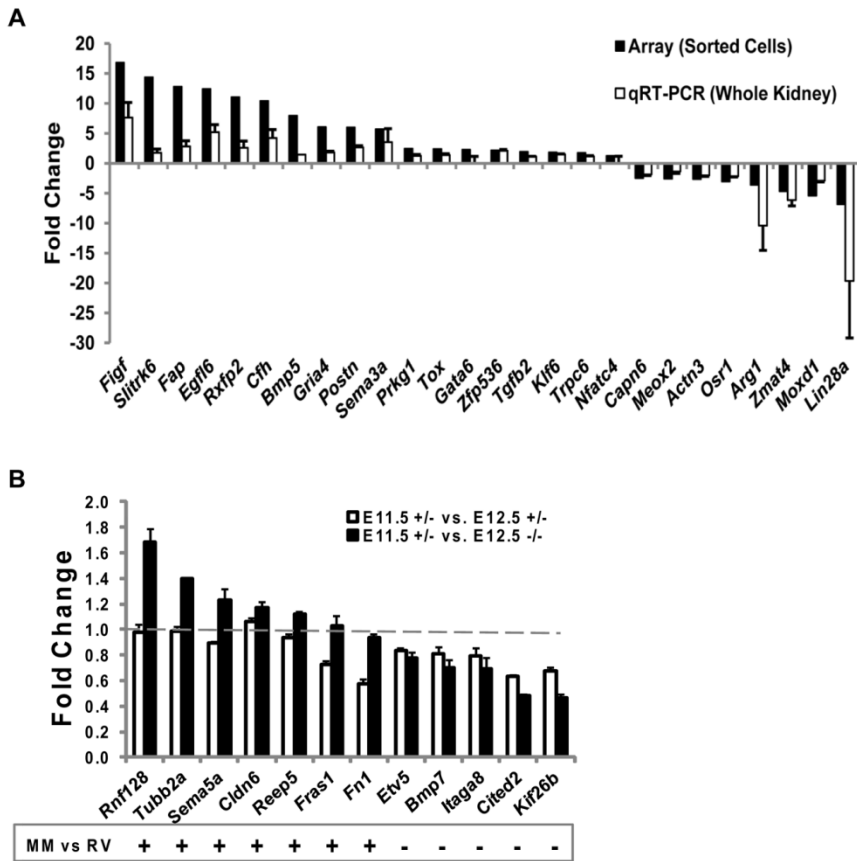

36  
 37 **Supplemental Figure 2. Transcriptional profiling validation.**  
 38 **A.** Gene expression changes were validated in whole kidney comparing developmentally  
 39 stage matched E11.5 +/- and E12.5 -/- kidneys. Results of qRT-PCR performed in triplicate  
 40 ( $\pm$  s.e.m.) from two independent pools of cDNA from whole kidney.  
 41 **B.** A number of genes that change in expression from MM to RV (+ up and - down)  
 42 (Brunskill et al., 2008), show a correlative change in expression in the *Sall1*<sup>GFP</sup> -/- kidney.  
 43 Genes that normally go up in expression in the RV show a greater increase in expression in  
 44 the mutant compared to the change observed in the control from E11.5 to E12.5. The  
 45 correlative association is also true for those genes that decrease in expression from the MM  
 46 to RV transition.

47  
 48  
 49  
 50  
 51  
 52  
 53  
 54

**Supplementary Table 1. qRT-PCR Primers.**

| <b>Gene</b>               | <b>Forward Primer</b>     | <b>Reverse Primer</b>     |
|---------------------------|---------------------------|---------------------------|
| <i>Actn3</i>              | GGGGCGGCGAGTACATGGAACA    | TGCGCAGATGTGAGTTGCACCA    |
| <i>Arg1</i>               | AGGACAGCCTCGAGGAGGGTA     | GCCAGGTCCCCGTGGTCTCTC     |
| <i>Bbx</i>                | AGAGGGAAACGAAGCTCAGG      | TTCATCCAGCTTCGCAGAAC      |
| <i>Bmp5</i>               | ACAGCTCTGTGCAGAGACGGG     | GCCCATGTCTTCCCACAAGACCA   |
| <i>Bmp7</i>               | ACGGACAGGGCTTCTCCTAC      | ATGGTGGTATCGAGGGTGGAA     |
| <i>Capn6</i>              | GGGAAGGTGGTGTGGAAGCGTC    | TGGTGGTTGCTGATGTTGCCA     |
| <i>Ccnd1</i>              | GCGTACCCTGACACCAATCTC     | CTCCTCTTCGCACTTCTGCTC     |
| <i>Cdh5 (VE-Cadherin)</i> | AATCGCTGCCCCACTATGT       | AGTACTCAGAGACTTTCTCCCGG   |
| <i>Cfh</i>                | TGGTGCAGATGGGTGGATCAATG   | TGGTCTGTTTCTGCTGCACCACT   |
| <i>Cited1</i>             | AAGGCACAGCACCCACTC        | AGTGCAGGCCTCGACATAGT      |
| <i>Cited2</i>             | CCATCGGCTGTCCCTCTAT       | GTGGTTCATGGCCATCATATG     |
| <i>Cldn6</i>              | CGAGGCTCGGATATCAGG        | TCAGGACGATCCCCAAGAT       |
| <i>c-Myc</i>              | GAGCTGTTTGAAGGCTGGAT      | CGAGGTCATAGTTCCTGTTGG     |
| <i>Egfl6</i>              | GGGGCAATGGCCTGCAGTGTT     | ATGGTGCCTTGTGAGCCAGT      |
| <i>Etv5</i>               | CCAGAACCTGGATCACAGC       | GGCTCAGACAGCTGTTCGC       |
| <i>Eya1</i>               | CATAGCCGACTGAGTGGTAGT     | GCTCTGTTTTAACTTCGGTGCC    |
| <i>Fap</i>                | CTCACCACGTGGGCCCAATGG     | GACACCCATGTGAGCCAGCTGAA   |
| <i>Fgf20</i>              | ATCAGTGTGGCAGTGGGACT      | CAAATTGTTCCCTGAAGATGC     |
| <i>Fgf8</i>               | AGAAGACGGAGACCCCTTCG      | TGAATACGCAGTCCCTTGCCCT    |
| <i>Figf</i>               | GCTCAGCATCCCATCGCTCCA     | ACGCATGTCTCTCTAGGGCTGCA   |
| <i>Flkl</i>               | TTTGGCAAATACAACCCTTCAGA   | GCAGAAGATACTGTCACCACC     |
| <i>Fn1</i>                | GCTTTAAGCTCACATGCCAGT     | GAGGCATGTGCAGCTCATC       |
| <i>Foxd1</i>              | GTTTAGCTCAGAGGGTCCATCTAT  | AGTGCCAAGACAGAGCGACT      |
| <i>Fras1</i>              | TGCTTGTCTGTATCAGGGCTC     | TTCTCAAAGGCACACCGAG       |
| <i>Gata6</i>              | TCGAAACGCCGGTGTCTCCAC     | CAACAGGTCTGTGCTGGGGCC     |
| <i>Gdnf</i>               | GGCTGTCTGCCTGGTGTT        | TGACGTCATCAAACCTGGTCA     |
| <i>Gria4</i>              | GCTATGGTGTAGCGACGCCCA     | CAGCTTGTCTAAGACGCCTGCC    |
| <i>Hprt1</i>              | TCAGTCAACGGGGGACATAAA     | GGGGCTGTACTGCTTAACCAG     |
| <i>Itga8</i>              | TGGCTGGGATTCCAAGAGGA      | GTGCCCCGACCAATATGTCA      |
| <i>Jag1</i>               | TATGCCTGTGACCAGAACGG      | CCTGCAGTCACCTGGAAGTT      |
| <i>Kif26b</i>             | CAACAAGGTGAAGGACACTCC     | TGACCTCCGCAAGTCAGG        |
| <i>Klf6</i>               | AACCCGACATGGATGTGCTCCC    | AACTCCAGGCAGGTCTGTTGCCA   |
| <i>Lama4</i>              | GCCCCAGGGCAATAGAACAT      | GGGTCTTCAGACGAATGGCA      |
| <i>Lin28a</i>             | CACTGGCCCTGGTGGTGTGTT     | TGATGGTCTAGCCCACCGCAGT    |
| <i>Mecom</i>              | GGCAAGGAAACTGGCCACAA      | AGGAGAGCATGGCTCTTGAA      |
| <i>Meox2</i>              | GCGTGCACACCAGGGGATTAT     | TCCTTCTGGGAATCTGAGCTGTCTG |
| <i>Moxd1</i>              | CACGTTGGCTTATCCCTCGGCA    | ACCCTCAGCCCCGAACTGTCTA    |
| <i>Nfatc4</i>             | ACCCTGGAGGAAGTGAGTGAGATCA | TGGGGCTTCGGGGACCACTAC     |
| <i>Npy</i>                | CCGCTCTGCGACACTACATC      | TGTTCTGGGGGCGTTTTCTG      |

|                       |                          |                           |
|-----------------------|--------------------------|---------------------------|
| <i>Osr1</i>           | AGCGACCCTCACAGACGCGC     | AATGGGTACCGGTGCTGGCAAG    |
| <i>Postn</i>          | CATTGAAGGTGGCGATGGTCACTT | GGCCCTTGAACCCTTTTGTGGC    |
| <i>Pparg</i>          | GTCCTTCCCGCTGACCAA       | GCCACCTCTTTGCTCTGCT       |
| <i>Prkg1</i>          | AAGCAGATCATGCAGGGGGCT    | CCACCCAGGCACGCTTCCATC     |
| <i>Ptprcap (CD45)</i> | CTACCACAACGAAGCAAACATG   | CACGTTTTTACAATCCTCATTTC   |
| <i>Raldh2</i>         | CTCTTGGTTCTGTGTGGAGAAG   | CGCCATTTAGGGATTCCATAGTT   |
| <i>Reep5</i>          | TCATCGGACTGGTGGCTT       | GTCAGCCACTGGGTGTCAT       |
| <i>Ret</i>            | TACCGTCTGATGCTGCAGTG     | TGCAGCCAGGTCCAAGTAGT      |
| <i>Rnf128</i>         | GCACCTTGAAACAAGGAGACA    | GGGTCCACACATGTCTTATGG     |
| <i>Rpl 19</i>         | CCAATGCCAACTCCCGTCA      | TACCCTTCCTCTTCCCTATGC     |
| <i>Rxfp2</i>          | ACACCGGACACCTCTCGAGCG    | GGGCACAGAGGAGCCACCATACT   |
| <i>Sall1GFP</i>       | CTCAACATTTCCAATCCGACCC   | GTGAACAGCTCCTCGCCCTT      |
| <i>Sema3a</i>         | GACCGTCTTCCGGGAACCAACAAC | GTGCCACTCCCGCAGTTGAGC     |
| <i>Sema5a</i>         | GGCATCTGGGCTGGTGTGTGACA  | ACCGAGGAGAGAGAGGGCAAAGA   |
| <i>Six2</i>           | GCAAGTCAGCAACTGGTTCA     | CTTCTCATCCTCGGAACTGC      |
| <i>Slitrk6</i>        | TCGCACCAGGAAGTGACTGCTTT  | TGGGACTGTAGAGACAGACAAGCAA |
| <i>Tgfb2</i>          | AGCGGAGCGACGAGGAGTACT    | AAGTGGGCGGGATGGCATTTCG    |
| <i>Tox</i>            | ACACTCGCCCACCATGCAGC     | CGCACGTAATCCATCGCTTGGG    |
| <i>Trpc6</i>          | GGCATGCATCCAAAGCTCAGAGCA | GGTCCCCTTTATCCTGGCCAGA    |
| <i>Tubb2a</i>         | TTAGCCCTCTGTCCACGC       | TATCACCTCCCAAACTTAGCG     |
| <i>Zfp536</i>         | ACCGGAAGCGCCCAAGAGGAT    | CTGTCTCGAAGCAGCGCCTGC     |
| <i>Zmat4</i>          | CCGCGTTGCCTTGCTAGAGC     | GCGACACACTGCACGTGGTACA    |

**Supplemental Table 2. Primers for WISH probes.**

| <b>Gene</b>   | <b>Forward</b>                                                   | <b>Reverse</b>          |
|---------------|------------------------------------------------------------------|-------------------------|
| <i>Bbx</i>    | AAACGACCAAAACGGAAGTG                                             | TGCCAGTTGAAAGAGTGCAG    |
| <i>Bmp7</i>   | AGGTGCACTCCAGCTTCATC                                             | TCTTGGTTCTTTGGCGTCTT    |
| <i>Ccnd1</i>  | TGAAGGAGACCATTCCCTTG                                             | CCCTACTCTCAGGGTGTATGC   |
| <i>Cited1</i> | ATGCCAACTATGTGAGGC                                               | TCAGCAGCCAGAGGGAAA      |
| <i>Eya1</i>   | Gift from Richard Maas and Pin Xu, Brigham and Women's Hospital. |                         |
| <i>Fgf8</i>   | ACCCAGCTGACACTCTCG                                               | CTCTGCTCGGTGGTGTGGT     |
| <i>Lef1</i>   | AAGATCTTCGCCGAGATCAG                                             | ATAGCTGGATGAGGGATGCC    |
| <i>Lhx1</i>   | CCCATCCTGGACCGTTTC                                               | GCCAGTTGCTCACGGATATG    |
| <i>Myc</i>    | CCTGACGACGAGACCTTCAT                                             | TCGTCTGCTTGAATGGACAG    |
| <i>Osr1</i>   | ATGGGCAGCAAAACCTTG                                               | CACACTCTTGACACTTGAAAGGC |
| <i>Pax8</i>   | TCACAACCTCGATCAGATCCG                                            | TCGAGATGGTGTGCTGGCTG    |
| <i>Six2</i>   | AATGAAAGCGTGCTCAAGG                                              | ACTGGTACGGTACTGCGC      |
| <i>Wnt4</i>   | AGCAATTGGCTGTACCTGG                                              | ACTTGACGAAGCAGCACCA     |
| <i>Wnt9b</i>  | CAGTGGGGTGTGTGTGGT                                               | GCGCTTGCAGGTATACACG     |
| <i>Wnt11</i>  | GTGTGCTATGGCATCAAGTGG                                            | TTCCAACAGGTGCGGATG      |
